# Supplementary material for: The Comprehensive Detection of miRNA and circRNA in the Regulation of Intramuscular and Subcutaneous Adipose Tissue of Laiwu pig
Source: Research Square preprint supplement (doi:10.21203/rs.3.rs-1628040/v1), 2022-06-01
Supplement: Supplementary file 1 [file fb3f121241bfce2240baa9bc.xlsx]

## Sheet: Sheet1
Sample	raw reads	clean reads	valid bases	Q30	GC
Sample_L_JN_1	80013516	77555412	0.9676	0.9225	0.63
Sample_L_JN_2	79818561	77374868	0.9678	0.9237	0.61
Sample_L_JN_3	79623606	77194324	0.968	0.9249	0.59
Sample_L_PX_1	79432576	75995332	0.9546	0.9038	0.665
Sample_L_PX_2	79473958	75914582	0.9528	0.9044	0.665
Sample_L_PX_3	79526364	76470692	0.9598	0.9152	0.615
